1 **RNA polymerase errors cause splicing defects and can be regulated by**  
2 **differential expression of RNA polymerase subunits.**

3

4 **Lucas B. Carey<sup>1\*</sup>**

5

6 <sup>1</sup> Department of Experimental and Health Sciences, Universitat Pompeu Fabra, Dr.

7 Aiguader 88, 08003 Barcelona, Spain.

8

9 \* Correspondence to: Lucas B. Carey ([lucas.carey@upf.edu](mailto:lucas.carey@upf.edu))

10

11 Errors during transcription may play an important role in determining  
12 cellular phenotypes: the RNA polymerase error rate is >4 orders of magnitude  
13 higher than that of DNA polymerase and errors are amplified >1000-fold due to  
14 translation. However, current methods to measure RNA polymerase fidelity are low-  
15 throughout, technically challenging, and organism specific. Here I show that changes  
16 in RNA polymerase fidelity can be measured using standard RNA sequencing  
17 protocols. I find that RNA polymerase is error-prone, and these errors can result in  
18 splicing defects. Furthermore, I find that differential expression of RNA polymerase  
19 subunits causes changes in RNA polymerase fidelity, and that coding sequences may  
20 have evolved to minimize the effect of these errors. These results suggest that errors  
21 caused by RNA polymerase may be a major source of stochastic variability at the  
22 level of single cells.

23

24           The information that determines protein sequence is stored in the genome  
25 but that information must be transcribed by RNA polymerase and translated by the  
26 ribosome before reaching its final form. DNA polymerase error rates have been well  
27 characterized in a variety of species and environmental conditions, and are low, on  
28 the order of one mutation per  $10^8 - 10^{10}$  bases per generation<sup>1-3</sup>. In contrast, RNA  
29 polymerase errors are uniquely positioned to generate phenotypic diversity. Error  
30 rates are high ( $10^{-6}$ - $10^{-5}$ )<sup>4-7</sup>, and each mRNA molecule is translated into 2,000 -  
31 4,000 molecules of protein<sup>8,9</sup>, resulting in amplification of any errors. Likewise,  
32 because many RNAs are present in less than one molecule per cell in microbes<sup>10,11</sup>  
33 and embryonic stem cells<sup>12</sup>, an RNA with an error may be the only RNA for that  
34 gene; all newly translated protein will contain this error. Despite the fact that  
35 transient errors can result in altered phenotypes<sup>13,14</sup>, the genetics and  
36 environmental factors that affect RNA polymerase fidelity are poorly understood.  
37 This is because current methods for measuring polymerase fidelity are technically  
38 challenging<sup>4</sup>, require specialized organism-specific genetic constructs<sup>15</sup>, and can  
39 only measure error rates at specific loci<sup>16</sup>.

40

41           To overcome these obstacles I developed MORPhEUS (Measurement Of RNA  
42 Polymerase Errors Using Sequencing), which enables measurement of differential  
43 RNA polymerase fidelity using existing RNA-seq data (**Figure 1**). The input is a set  
44 of RNA-seq fastq files and a reference genome, and the output is the error rate at  
45 each position in the genome. I find that RNA polymerase errors result in intron  
46 retention and that cellular mRNA quality control may reduce the effective RNA

47 polymerase error rate. Moreover, our analyses suggest that the expression level of  
48 the RPB9 Pol II subunit determines RNA polymerase fidelity *in-vivo*. Because it can  
49 be run on any existing RNA-seq data, MORPhEUS enables the exploration of a  
50 previously unexplored source of biological diversity in microbes and mammals.

51

52 Technical errors from reverse transcription and sequencing, and biological  
53 errors from RNA polymerase look identical (single-nucleotide differences from the  
54 reference genome). Therefore, a major challenge in identifying SNPs and in  
55 measuring changes in polymerase fidelity is the reduction of technical errors<sup>17-</sup>  
56 <sup>19</sup>**(Figure 1)**. First, I map full length (untrimmed) reads to the genome, and discard  
57 reads with indels, more than two mismatches, reads that map to multiple locations  
58 in the genome, and reads that do not map end-to-end along the full length of the  
59 read. I next trim the ends of the mapped reads, as alignments are of lower quality  
60 along the ends, and the mismatch rate is higher, especially at splice junctions. I also  
61 discard any cycles within the run with abnormally high error rates, and bases with  
62 low Illumina quality scores **(Figure 1 – figure supplement 1)**. Finally, using the  
63 remaining bases, I count the number of matches and mismatches to the reference  
64 genome at each position in the genome. I discard positions with identical  
65 mismatches that are present more than once, as these are likely due to subclonal  
66 DNA polymorphisms or sequences that Illumina miscalls in a systematic manner<sup>20</sup>  
67 **(Figure 1 – figure supplement 2)**. The result is a set of mismatches, many of which  
68 are technical errors, some of which are RNA polymerase errors. In order to  
69 determine if RNA-seq mismatches are due to RNA polymerase errors it is necessary

70 to identify sequence locations in which RNA polymerase errors are expected to have  
71 a measurable effect, or situations in which RNA polymerase fidelity is expected to  
72 vary.

73

74 I reasoned that RNA polymerase errors that alter positions necessary for  
75 splicing should result in intron retention, while sequencing errors should not affect  
76 the final structure of the mRNA (**Figure 2a**). However, mutations in the donor and  
77 acceptor splice sites also result in decreased expression<sup>36</sup>, and therefore are difficult  
78 to measure using RNA-seq. I therefore used chromatin-associated and nuclear RNA  
79 from HeLa and Huh7 cells<sup>37</sup>, and extracted all reads that span an exon-intron  
80 junction for introns with canonical GT and AG splice sites, and measured the RNA-  
81 seq mismatch rate at each position. I find that errors at the G and U in the 5' donor  
82 site, and at the A in the acceptor site are significantly enriched relative to errors at  
83 other positions (**Figure 2b**), and to errors trinucleotides present in the splicing  
84 motifs in the human genome (**Figure 2 - figure supplement 1**) suggesting that  
85 RNA polymerase mismatches can result in changes in transcript isoforms. The  
86 ability of RNA polymerase errors to significantly affect splicing has been proposed<sup>22</sup>  
87 but never previously measured.

88

89 RPB9 is known to be involved in RNA polymerase fidelity *in vitro* and *in*  
90 *vivo*<sup>15,23</sup>. I therefore reasoned that cell lines expressing low levels of RPB9 would  
91 have higher RNA polymerase error rates. Consistent with this, I find that RPB9  
92 expression varies 8-fold across the ENCODE cell lines, and this expression variation

93 is correlated with the RNA-seq error rate (**Figure 2c, Figure 2 – figure supplement**  
94 **2**). This suggests that low RPB9 expression may cause decreased polymerase  
95 fidelity *in-vivo*.

96  
97 In addition, export of mRNAs from the nucleus involves a quality-control  
98 mechanism that checks if mRNAs are fully spliced and have properly formed 5' and  
99 3' ends<sup>24</sup>. I hypothesized that mRNA export may involve a quality control that  
100 removes mRNAs with errors. I used the ENCODE dataset in which nuclear and  
101 cytoplasmic poly-A+ mRNAs I re sequenced, thus I can compare nuclear and  
102 cytoplasmic fractions from the same cell line grown in the same conditions and  
103 processed in the same manner. I find that the nuclear fraction has a higher RNA  
104 polymerase error rate than does the cytoplasmic fraction (**Figure 2c,d**), suggesting  
105 that either that nuclear RNA-seq has a higher technical error rate or that the cell has  
106 mechanisms for reducing the effective polymerase error rate by preventing the  
107 export of mRNAs that contain errors.

108  
109 Rpb9 and Dst1 are known to be involved in RNA polymerase fidelity *in-vitro*,  
110 yet there is conflicting evidence as to the role of Dst1 *in-vivo*<sup>6,15,23,25-27</sup>. Part of these  
111 conflicts may result from the fact that the only available assays for RNA polymerase  
112 fidelity are special reporter strains that rely on DNA sequences known to increase  
113 the frequency of RNA polymerase errors. While I found that RPB9 expression  
114 correlates with RNA-seq error rates in mammalian cells, correlation is not  
115 causation. Furthermore, differences in RNA levels do not necessitate differences in

116 stoichiometry among the subunits in active Pol II complexes. In order to determine  
117 if differential expression of RPB9 or DST1 are causative for differences in RNA  
118 polymerase fidelity in-vivo, I constructed two yeast strains in which I can alter the  
119 expression of either RPB9 or DST1 using B-estradiol and a synthetic transcription  
120 factor that has no effect on growth rate or the expression of any other genes<sup>28,29</sup>. I  
121 grew these two strains (  $Z_3EV_{pr}$ -RPB9 and  $Z_3EV_{pr}$ -DST1 ) in different concentrations  
122 of B-estradiol and performed RNA-seq. I find that cells expressing low levels of  
123 RPB9 have high RNA polymerase error rates (**Figure 3a**). Likewise, cells with low  
124 DST1 have high error rates (**Figure 3a**). The increase in errors rate is not a property  
125 of cells defective for transcription elongation (**Figure 3 – figure supplement 1**).  
126 The increase in error rates due to mutations in Rpb9 and Dst1 have not been  
127 robustly measured, however, there are some rough numbers. Here, the measured  
128 increase in error rate is 13%, while the measured effect of Rpb9 deletion *in-vitro* is  
129 5-fold<sup>38</sup> and in-vivo following reverse transcription is 30%<sup>25</sup>. If 2% of the observed  
130 mismatches are due to RNA polymerase errors, a 5-fold increase in polymerase  
131 error rate results in a 10% increase in measured mismatch frequency; this is  
132 consistent with RNA polymerase fidelity of  $10^{-6}$ - $10^{-5}$  and overall RNA-seq error rates  
133 of  $10^{-4}$ . Note that in our assay cells still express low levels of RPB9, and we therefore  
134 expect the increase in error rate to be lower, suggesting that RNA polymerase errors  
135 constitute 5-10% of the measured mismatches. Our ability to genetically control the  
136 expression of DST1 and RPB9, and measure changes in RNA-seq error rates is  
137 consistent with MORPhEUS measuring RNA polymerase fidelity. In addition, genetic  
138 reduction in RNA polymerase fidelity results in increased intron retention,

139 consistent with RNA polymerase errors causing reduced splicing efficiency (**Figure**  
140 **3b**).

141

142 A unique advantage of MORPhEUS is that it measures thousands of RNA  
143 polymerase errors across the entire transcriptome in a single experiment, and thus  
144 enables a complete characterization of the mutation spectrum and biases of RNA  
145 polymerase. I asked how altered RPB9 and DST1 expression levels affect each type  
146 of single nucleotide change. I find that, with decreasing polymerase fidelity,  
147 transitions increase more than transversions, and that C->U errors are the most  
148 common (**Figure 3c**). This result, along with other sequencing based results<sup>4</sup>, have  
149 shown that DNA and RNA polymerase have broadly similar error profiles<sup>2</sup>; it will be  
150 interesting to see if all polymerases share the same mutation spectra, and if this is  
151 due to deamination of the template base, or is a structural property of the  
152 polymerase itself. Interestingly, I find that coding sequences have evolved so that  
153 errors are less likely to produce in-frame stop codons than out-of-frame stop  
154 codons, suggesting that natural selection may act to minimize the effect of  
155 polymerase errors (**Figure 4**).

156

157 Here I have presented proof that relative changes in RNA polymerase error  
158 rates can be measured using standard Illumina RNA-seq data. Consistent with  
159 previous work *in-vivo* and *in-vitro*, I find that depletion of RPB9 or Dst1 results in  
160 higher RNA polymerase error rates. Furthermore, I find that expression of RPB9  
161 negatively correlates with RNA-seq error rates in human cell lines, suggesting that

162 differential expression of RPB9 may regulate RNA polymerase fidelity in-vivo in  
163 humans. In addition, consistent with the errors detected by MORPhEUS being due to  
164 RNA polymerase and not technical errors, in reads spanning an exon-intron  
165 junction, the measured error rate is higher at the 5' donor splice site, suggesting that  
166 RNA polymerase errors result in intron retention. Because it can be run on existing  
167 RNA-seq data, I expect MORPhEUS to enable many future discoveries regarding both  
168 the molecular determinants of RNA polymerase error rates, and the relationship  
169 between RNA polymerase fidelity and phenotype.

170

## 171 **Acknowledgements**

172 I thank members of the Carey lab and the computational genomics groups in the  
173 PRBB for thoughtful discussions.

174

## 175 **Materials and methods**

### 176 **Counting RNA polymerase errors in already aligned ENCODE data**

177 Much existing RNA-seq data is available as bam files aligned to the human  
178 genome. In order to bypass the most computationally expensive step of the pipeline,  
179 I developed a method capable of using RNA-seq reads aligned with spliced aligners.  
180 First, in order to avoid increased mismatch rates at splice junctions due to  
181 alignment problems with both spliced and unspliced reads, I used samtools<sup>30</sup> and



182 awk to remove all alignments that don't align along the full length of the genome  
183 (eg: for 76bp reads, only reads with a CIGAR flag of 76M). The remaining reads I re  
184 trimmed (bamUtil , trimBam) to convert the first and last 10bp of each read to Ns  
185 and set the quality strings to '!'. I then used samtools mpileup (-q30 -C50 -Q30) and  
186 custom perl code to count the number of reads and number of errors at each  
187 position in genome. Positions with too many errors (eg: more than one read of the  
188 same non-reference base) I re not counted.

189

## 190 **Measurement of error rates at splice junctions**

191 I used the UCSC table browser<sup>31</sup> to download two bed files: hg19  
192 EnsemblGenes introns with -10bp flanking from each side, and another file with the  
193 introns and +10bp flanking on either side. I then used bedtools<sup>32</sup> (bedtools flank -b  
194 20 -l 0 & bedtools flank -l 20 -b 0) to generate bed files with intervals that contain  
195 the splicing donor and acceptor sites, respectively. In addition, I used bedtools  
196 getfasta on the +10bp flanking bed file to keep only introns flanked by GT and AG  
197 donor and acceptor sites. The final result is a pair of bam files with intervals  
198 centered on the splicing donor or acceptor sites. I used this new bed file to count  
199 error rates around each splice junction. The error rate at each position (eg: -10, -9, -  
200 8, etc from the G at the 5' donor site) is the sum of all errors at that position, divided  
201 by the sum of all reads. Positions are relative to the splicing feature, not to the  
202 genome, as error rates at any single genomic position are dominated by sampling  
203 bias. Per mono, di and tri-nucleotide background error rates I re calculated using  
204 the same scripts, but without limiting mpileup to the splice junctions.

205

206 **Strain construction and RNA sequencing for RPB9 and DST1 strains**

207 The parental strain DBY12394<sup>33</sup> (GAL2+ s288c repaired HAP1, ura3Δ,  
208 leu2Δ0::ACT1pr-Z3EV-NatMX) was transformed with a PCR product (KanMX-  
209 Z3EVpr) to generate a genomically integrated inducible RPB9 (LCY143) or DST1  
210 (LCY142). Correct transformants were confirmed by PCR. To induce various levels of  
211 expression, strains were grown in YPD + 0,3,6,12 or 25nM β-estradiol (Sigma E4389)  
212 for more than 12 hours to a final OD<sub>600</sub> of 0.1 – 0.4. Cellular RNA was extracted using  
213 the Epicenter MasterPure RNA Purification Kit, and Illumina sequencing libraries were  
214 prepared using the Truseq Stranded mRNA kit, and sequenced on a HiSeq2000  
215 with at least 20,000,000 50bp sequencing reads per sample.

216

217 I used bwa<sup>34</sup> (-n 2, to permit no more than two mismatches in a read) to align the  
218 yeast RNA-seq reads to the reference genome, and trimBam from bamUtil to mask  
219 the first and last 10bp of each read. I used samtools mpileup<sup>30</sup> (-q 30 -d 100000 -  
220 C50 -Q39) to count the number of reads and mismatches at each position in the  
221 genome, discarding low confidence mapping, reads that map to multiple positions,  
222 and low quality reads. Duplicate reads can be removed from the fastq file if the  
223 coverage is low enough so that all unique read sequences are expected to come from the  
224 same RNA fragment; this is the case for low coverage paired-end reads with a  
225 variable insert size, but not for very high coverage datasets or single-ended reads.

226

227 **pre-existing RNA-seq datasets.**

228 For the intron retention analysis in human cells, data were downloaded from  
229 <http://www.ncbi.nlm.nih.gov/bioproject/PRJNA253670> and reads mapped using  
230 bwa. For RPB9 correlation, ENCODE<sup>35</sup> data (SRA PRJNA30709) from the Gingeras  
231 lab at CSHL I re downloaded from NCBI SRA. Data for elc4 and spt4 were  
232 downloaded from <http://www.ncbi.nlm.nih.gov/bioproject/PRJNA167772> and  
233 <http://www.ncbi.nlm.nih.gov/bioproject/PRJNA148851>, respectively.

## 234 **Competing financial interests**

235 The author declares no competing financial interests.

## 236 **References**

- 237 1. Lynch, M. The lower bound to the evolution of mutation rates. *Genome Biol*  
238 *Evol* **3**, 1107–1118 (2011).
- 239 2. Zhu, Y. O., Siegal, M. L., Hall, D. W. & Petrov, D. A. Precise estimates of mutation  
240 rate and spectrum in yeast. *PNAS* **111**, E2310–8 (2014).
- 241 3. Lang, G. I. & Murray, A. W. Estimating the per-base-pair mutation rate in the  
242 yeast *Saccharomyces cerevisiae*. *Genetics* **178**, 67–82 (2008).
- 243 4. Gout, J.-F., Thomas, W. K., Smith, Z., Okamoto, K. & Lynch, M. Large-scale  
244 detection of in vivo transcription errors. *PNAS* **110**, 18584–18589 (2013).
- 245 5. Lynch, M. Evolution of the mutation rate. *Trends Genet.* **26**, 345–352 (2010).
- 246 6. Shaw, R. J., Bonawitz, N. D. & Reines, D. Use of an in vivo reporter assay to test

- 247 for transcriptional and translational fidelity in yeast. *J. Biol. Chem.* **277**,  
248 24420–24426 (2002).
- 249 7. de Mercoyrol, L., Corda, Y., Job, C. & Job, D. Accuracy of wheat-germ RNA  
250 polymerase II. General enzymatic properties and effect of template  
251 conformational transition from right-handed B-DNA to left-handed Z-DNA.  
252 *Eur. J. Biochem.* **206**, 49–58 (1992).
- 253 8. Schwanhäusser, B. *et al.* Global quantification of mammalian gene expression  
254 control. *Nature* **473**, 337–342 (2011).
- 255 9. Futcher, B., Latter, G. I., Monardo, P., McLaughlin, C. S. & Garrels, J. I. A  
256 sampling of the yeast proteome. *Mol. Cell. Biol.* **19**, 7357–7368 (1999).
- 257 10. Fuhrmann, C. N., Halme, D. G., O'Sullivan, P. S. & Lindstaedt, B. A complete set  
258 of nascent transcription rates for yeast genes. *PLoS ONE* **5**, e15442–249  
259 (2010).
- 260 11. Hereford, L. M. & Rosbash, M. Number and distribution of polyadenylated  
261 RNA sequences in yeast. *Cell* **10**, 453–462 (1977).
- 262 12. Islam, S. *et al.* Characterization of the single-cell transcriptional landscape by  
263 highly multiplex RNA-seq. *Genome Res.* **21**, 1160–1167 (2011).
- 264 13. Gordon, A. J. E., Satory, D., Halliday, J. A. & Herman, C. Heritable change caused  
265 by transient transcription errors. *PLoS Genet.* **9**, e1003595–e1003595 (2013).
- 266 14. Gordon, A. J., Satory, D., Halliday, J. A. & Herman, C. Lost in transcription:  
267 transient errors in information transfer. *Curr. Opin. Microbiol.* **24C**, 80–87  
268 (2015).
- 269 15. Irvin, J. D. *et al.* A genetic assay for transcription errors reveals multilayer

- 270 control of RNA polymerase II fidelity. *PLoS Genet.* **10**, e1004532 (2014).
- 271 16. Imashimizu, M., Oshima, T., Lubkowska, L. & Kashlev, M. Direct assessment of  
272 transcription fidelity by high-resolution RNA sequencing. *Nucleic Acids Res.*  
273 **41**, 9090–9104 (2013).
- 274 17. Kleinman, C. L. & Majewski, J. Comment on "Widespread RNA and DNA  
275 sequence differences in the human transcriptome". *Science* **335**, 1302–author  
276 reply 1302 (2012).
- 277 18. Pickrell, J. K., Gilad, Y. & Pritchard, J. K. Comment on "Widespread RNA and  
278 DNA sequence differences in the human transcriptome". *Science* **335**, 1302–  
279 author reply 1302 (2012).
- 280 19. Li, M. *et al.* Widespread RNA and DNA sequence differences in the human  
281 transcriptome. *Science* **333**, 53–58 (2011).
- 282 20. Meacham, F. *et al.* Identification and correction of systematic error in high-  
283 throughput sequence data. *BMC Bioinformatics* **12**, 451 (2011).
- 284 21. Tilgner, H. *et al.* Deep sequencing of subcellular RNA fractions shows splicing  
285 to be predominantly co-transcriptional in the human genome but inefficient  
286 for lncRNAs. *Genome Res.* **22**, 1616–1625 (2012).
- 287 22. Fox-Walsh, K. L. & Hertel, K. J. Splice-site pairing is an intrinsically high fidelity  
288 process. *Proc. Natl. Acad. Sci. U.S.A.* **106**, 1766–1771 (2009).
- 289 23. Knippa, K. & Peterson, D. O. Fidelity of RNA polymerase II transcription: Role  
290 of RPB9 in error detection and proofreading. *Biochemistry* **52**, 7807–7817  
291 (2013).
- 292 24. Lykke-Andersen, J. mRNA quality control: Marking the message for life or

- 293 death. *Curr. Biol.* **11**, R88–91 (2001).
- 294 25. Nesser, N. K., Peterson, D. O. & Hawley, D. K. RNA polymerase II subunit Rpb9  
295 is important for transcriptional fidelity in vivo. *Proc. Natl. Acad. Sci. U.S.A.* **103**,  
296 3268–3273 (2006).
- 297 26. Walmacq, C. *et al.* Rpb9 Subunit Controls Transcription Fidelity by Delaying  
298 NTP Sequestration in RNA Polymerase II. *J. Biol. Chem.* **284**, 19601–19612  
299 (2009).
- 300 27. Kireeva, M. L. *et al.* Transient reversal of RNA polymerase II active site closing  
301 controls fidelity of transcription elongation. *Mol. Cell* **30**, 557–566 (2008).
- 302 28. McIsaac, R. S., Gibney, P. A., Chandran, S. S., Benjamin, K. R. & Botstein, D.  
303 Synthetic biology tools for programming gene expression without nutritional  
304 perturbations in *Saccharomyces cerevisiae*. *Nucleic Acids Res.* **42**, e48–e48  
305 (2014).
- 306 29. McIsaac, R. S., Oakes, B. L., Botstein, D. & Noyes, M. B. Rapid synthesis and  
307 screening of chemically activated transcription factors with GFP-based  
308 reporters. *Journal of visualized experiments : JoVE* e51153–e51153 (2013).
- 309 30. Li, H. *et al.* The Sequence Alignment/Map format and SAMtools. *Bioinformatics*  
310 **25**, 2078–2079 (2009).
- 311 31. Karolchik, D. *et al.* The UCSC Table Browser data retrieval tool. *Nucleic Acids*  
312 *Res.* **32**, D493–6 (2004).
- 313 32. Quinlan, A. R. & Hall, I. M. BEDTools: a flexible suite of utilities for comparing  
314 genomic features. *Bioinformatics* **26**, 841–842 (2010).
- 315 33. McIsaac, R. S. *et al.* Synthetic gene expression perturbation systems with

- 316 rapid, tunable, single-gene specificity in yeast. *Nucleic Acids Res.* **41**, e57–e57  
317 (2013).
- 318 34. Li, H. & Durbin, R. Fast and accurate short read alignment with Burrows-  
319 Wheeler transform. *Bioinformatics* **25**, 1754–1760 (2009).
- 320 35. ENCODE Project Consortium. An integrated encyclopedia of DNA elements in  
321 the human genome. *Nature* **489**, 57–74 (2012).
- 322 36. Jung, H. et al. Intron retention is a widespread mechanism of tumor-  
323 suppressor inactivation. *Nat. Genet.* (2015).
- 324 37. Dhir, A. *et al.* Microprocessor mediates transcriptional termination of long  
325 noncoding RNA transcripts hosting microRNAs. *Nat. Struct. Mol. Biol.* **22**, 319–  
326 327 (2015).
- 327 38. Walmacq, C. et al. Rpb9 subunit controls transcription fidelity by delaying  
328 NTP sequestration in RNA polymerase II. *J. Biol. Chem.* **284**, 19601–19612  
329 (2009).
- 330  
331  
332

## 333 Figures

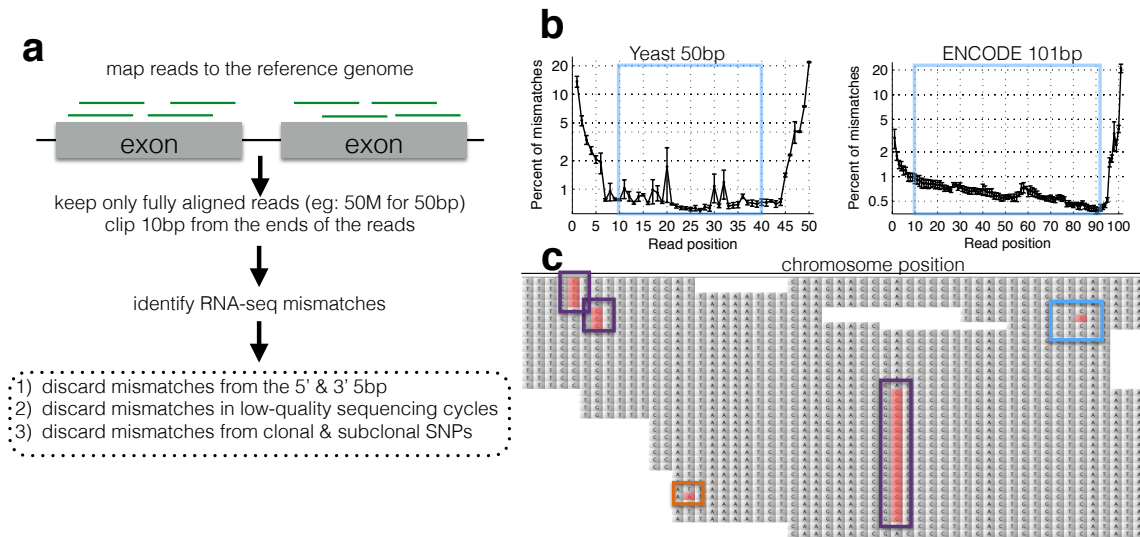

334  
335 **Figure 1. A computational framework to measure relative changes in RNA**  
336 **polymerase fidelity. (a)** Pipeline to identify potential RNA polymerase errors in  
337 RNA-seq data. High quality full-length RNA-seq reads are mapped to the reference  
338 genome or transcriptome using bwa, and only reads that map completely with two  
339 or fewer mismatches are kept. **(b)** Then 10bp from the front and 10bp from the end  
340 of the read are discarded as these regions have high error rates and are prone to  
341 poor quality local alignments. **(c)** Errors that occur multiple times (purple boxes)  
342 are discarded, as these are likely due to sub-clonal DNA mutations or sequences that  
343 sequence poorly on the HiSeq. Unique errors in the middle of reads (cyan box) are  
344 kept and counted.



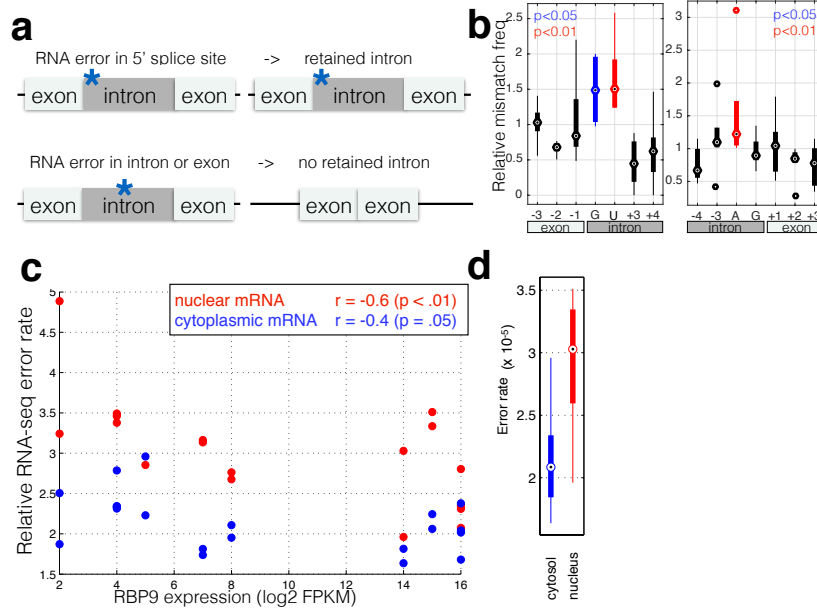

345  
346 **Figure 2. RNA polymerase errors cause intron retention and error rates are**  
347 **correlated with RPB9 expression. (a)** RNA polymerase errors at the splice junction  
348 should result in intron retention, as DNA mutations at the 5' donor site are known to  
349 cause intron retention. **(b)** Shown are the RNA-seq mismatch rates at each position  
350 relative to the 5' donor splice site, for sequencing reads that span an exon-intron  
351 junction. Mismatch rates from chromatin associated and nuclear RNAs are higher at  
352 the 5' and 3' splice sites, suggesting that RNA polymerase errors at this site result in  
353 intron retention. **(c)** For all ENCODE cell lines, RPB9 expression was determined  
354 from whole-cell RNA-seq data, and the RNA-seq error rate was measured separately  
355 for the cytoplasmic and nuclear fractions. **(d)** The RNA-seq error rate is higher  
356 (paired t-test,  $p=0.0019$ ) in the nuclear than the cytoplasmic fraction, suggesting  
357 that quality control mechanism may block nuclear export of low quality mRNAs.

358

359

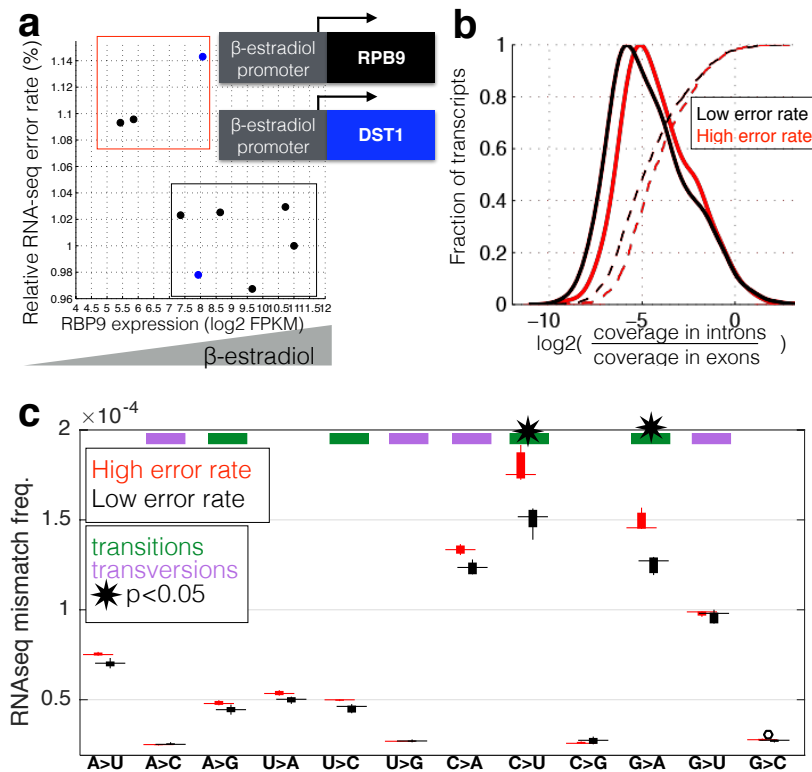

360

361 **Figure 3. RNA polymerase error rate is determined by the expression level of**

362 **RPB9 and DST1. (a)** RNA-seq error rates were measured for two strains (Z<sub>3</sub>EVpr-

363 RPB9, black points, Z<sub>3</sub>EVpr-DST1, blue points) grown at different concentrations of

364 β-estradiol. The points show the relationship between RPB9 expression levels

365 (determined by RNA-seq) and RNA-seq error rates. The blue points show RPB9

366 expression levels for the Z<sub>3</sub>EVpr-DST1 strain, in which DST1 expression ranges from

367 16 FPKM at 0nM β-estradiol to 120 FPKM native expression to 756 FPKM at 25nM

368 β-estradiol. Low induction of both DST1 or RPB9 results in high RNA-seq error rates

369 (red box), while wild-type and higher induction levels result low RNA-seq error

370 rates (black box). **(b)** Across all genes, the intron retention rate is higher in  
371 conditions with low RNA polymerase fidelity (t-test between high and low error rate  
372 samples,  $p=0.029$  ), consistent with the hypothesis that RNA polymerase errors  
373 result in splicing defects. **(c)** The error rate for each of the 12 single base changes  
374 are shown for induction experiments that gave high (red) or low (black) RNA-seq  
375 error rates. Transitions (G $\leftrightarrow$ A , C $\leftrightarrow$ U) are marked with green boxes and  
376 transversions (A $\leftrightarrow$ C , G $\leftrightarrow$ U) with purple  
377

378

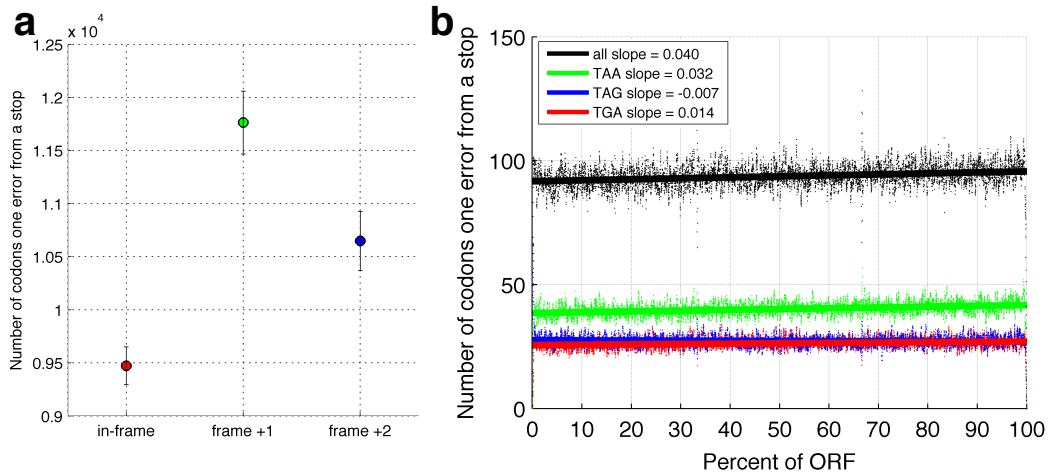

379

380 **Figure 4. In-frame stop codons are less likely to be created by polymerase**

381 **errors.** For all genes in yeast, I calculated the number of codons which are one

382 polymerase error from a stop codon. **(a)** Fewer in-frame codons can be turned into a

383 stop codon by a single nucleotide change, compared to out-of-frame codons. **(b)**

384 Codons that are one error away from generating an in-frame stop codon are more

385 likely to be found at the ends of ORFs, compared to the beginning of the ORF.

386

387

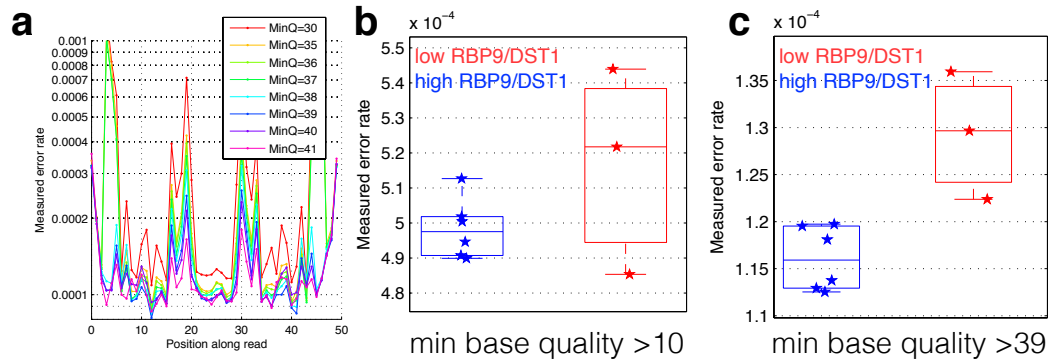

388

389 **Figure 1 - figure supplement 1. Cycle-specific error rates and better**  
390 **differentiation of genetically determined error rates using base quality**  
391 **cutoffs.** Six yeast RNA-cDNA libraries were sequenced on the same lane in a HiSeq.  
392 **(a)** The average mismatch rate (across the six cDNA libraries) to the reference  
393 genome at each position was determined using different minimum base-quality  
394 thresholds using GATK ErrorRatePerCycle. Independent of the quality threshold,  
395 cycles at the ends, as well as some cycles in the middle, have high error rates. **(b)**  
396 The measured error rate for each sample using a minimum base quality of 10. **(c)**  
397 The measured error rate for each sample using a minimum base quality of 39.

398

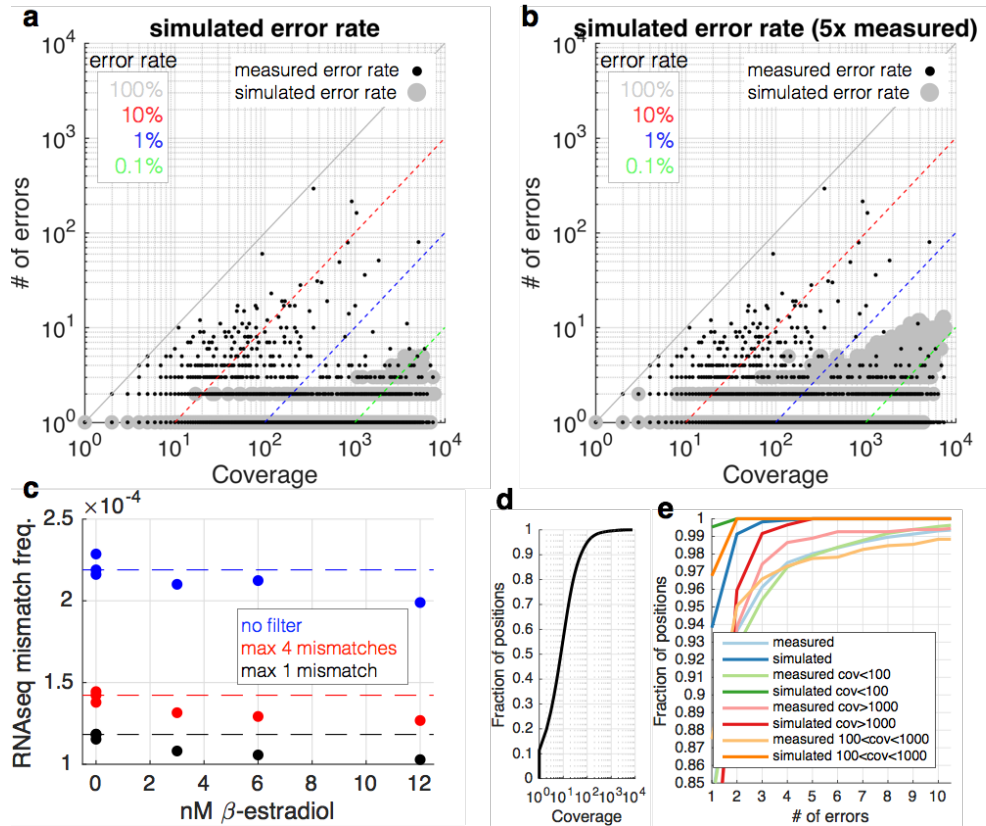

399

400 **Figure 1 – figure supplement 2. RNA-seq data are enriched for mismatches to**  
 401 **the reference genome that occur far more often than expected.**

402 **(a)** At each coverage (x-axis), a point is shown if there is any positions in the  
 403 genome with the observed number of errors (y-axis) (small black dots). The  
 404 diagonal lines show mismatch frequencies of 100%, 10%, 1% and 0.1% — any point  
 405 falling on these lines has the given mismatch frequency. With large grey circles are  
 406 shown simulated data in which the same coverage as the yeast RNA-seq data are  
 407 used, but with a mismatch frequency identical to the measured overall mismatch  
 408 frequency of the yeast data. Locations in the graph in which a black point occurs but  
 409 there is no grey point are locations in which there are more mismatches than  
 410 expected by chance. Note that at a coverage of less than 100, we expect to see no

411 mismatches more than twice, and 0.5% of positions with 2 observances of identical  
412 mismatches. **(b)** Identical to (a) but with the simulated mismatch frequency 5x the  
413 observed. **(c)** Shown are measured mismatch frequencies for the yeast RPB9 and  
414 DST1 induction data at different B-estradiol concentrations, at different filters for  
415 the maximal allowed number of observed identical mismatches. The dashed lines  
416 show the average mismatch frequency for the 0nM condition. For all filters, low B-  
417 estradiol conditions have higher RNA-seq mismatch frequencies. **(d)** The coverage  
418 of the yeast RNA-seq data; ~95% of the genome is covered by less than 100 reads.  
419 **(e)** Shown are the fraction of positions in the genome (y-axis) with X errors (x-axis)  
420 for the yeast RNAseq data (cyan) and simulated data (blue). Also shown are the  
421 same data for positions of the genome with different coverage. For positions  
422 covered by less than 1000 reads (95% of the genome) the expectation is 0 or 1  
423 sequence mismatch (blue and orange lines). Positions with far greater numbers of  
424 mismatches are likely due to sub-clonal mutations and technical bias.  
425

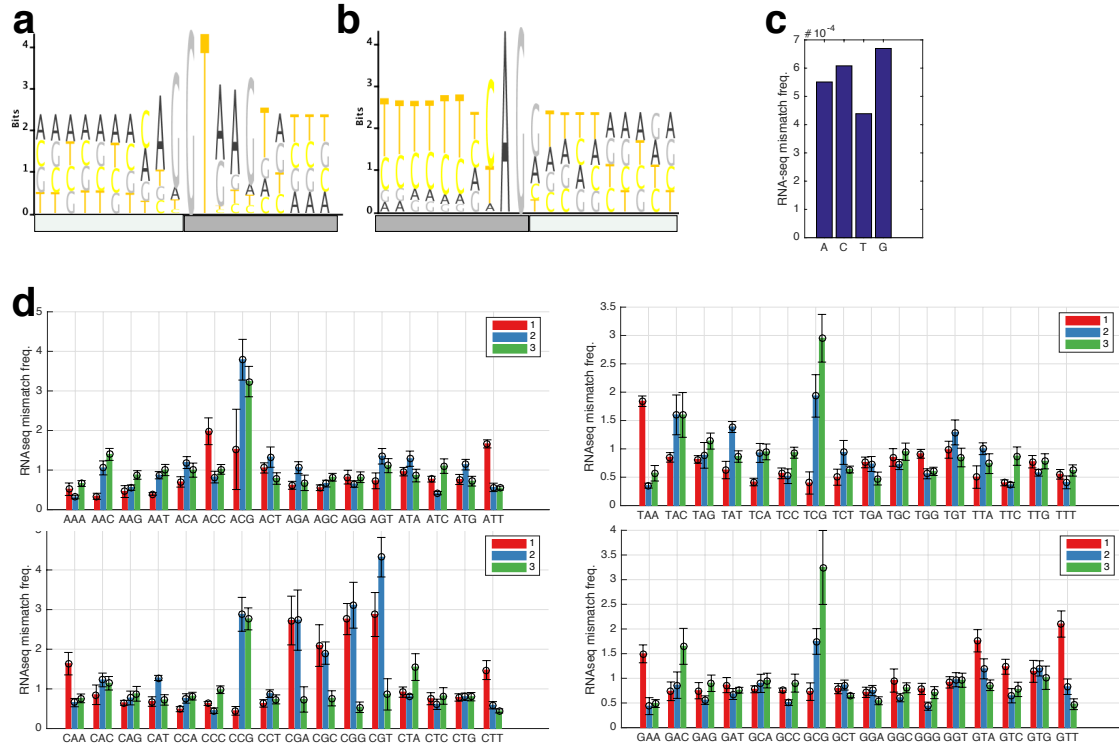

426

427 **Figure 2 – figure supplement 1. RNA-seq mismatch rates for all trinucleotides**

428 **in chromatin associated and nuclear RNAs. (a,b)** The 5' and 3' splicing motifs in

429 the human genome. **(c)** The RNA-seq mismatch frequencies for all single

430 nucleotides. **(d)** The RNA-seq mismatch rate to the reference genome for each

431 trinucleotide, normalized to the average mismatch rate across all trinucleotides. For

432 each trinucleotide, red shows the mismatch frequency at the first base, blue at the

433 second, and green at the third. Error bars are standard deviation across all samples.

434



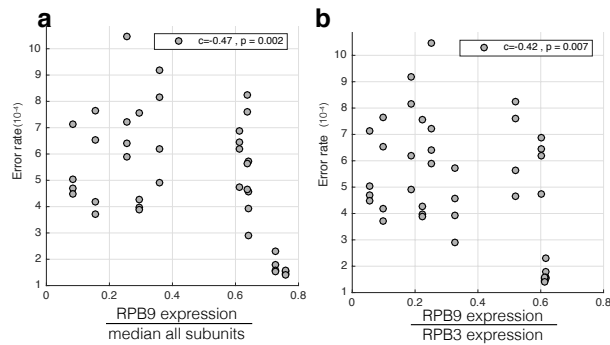

435

436 **Figure 2 – figure supplement 2. RBP9 expression negatively correlates with**

437 **RNA-seq mismatch rates.** The mismatch frequency is shown across all cells lines.

438 **(a)** RPB9 mRNA expression is normalized by the median expression level of all

439 subunits. **(b)** RPB9 mRNA expression is normalized by RBP3 (POLR2C) expression.

440

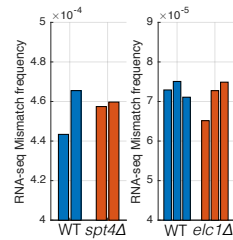

441

442 **Figure 3 – figure supplement 1. Mutations that affect transcription elongation**

443 **do not affect measured RNA-seq mismatch frequencies.** Two separate

444 experiments were performed with wild-type controls and mutants involved in

445 transcription elongation. Individual bars show the RNA-seq mismatch frequency of

446 biological replicates.
